# Supplementary material
Source: PubMed Central journal article supplement (PMC8929687)
Supplement: mmc1.pdf [file mmc1.pdf]

**Cell, Volume 185**

## **Supplemental information**

**T cell reactivity to the SARS-CoV-2**

**Omicron variant is preserved in most**

**but not all individuals**

**Vivek Naranbhai, Anusha Nathan, Clarety Kaseke, Cristhian Berrios, Ashok Khatri, Shawn Choi, Matthew A. Getz, Rhoda Tano-Menka, Onosereme Ofoman, Alton Gayton, Fernando Senjobe, Zezhou Zhao, Kerri J. St Denis, Evan C. Lam, Mary Carrington, Wilfredo F. Garcia-Beltran, Alejandro B. Balazs, Bruce D. Walker, A. John Iafrate, and Gaurav D. Gaiha**

**Table S1: Baseline characteristics of included samples (N=101 from 76 unique donors), related to Figure 1.**

|                                                                      | Unvaccinated,<br>N = 21 | pre-<br>boost, N<br>= 36 <sup>#</sup> | post-<br>boost, N<br>= 44 <sup>#</sup> |
|----------------------------------------------------------------------|-------------------------|---------------------------------------|----------------------------------------|
| <b>Age</b>                                                           | 34 (28, 58)             | 46 (38, 54)                           | 48 (40, 64)                            |
| <b>Sex</b>                                                           |                         |                                       |                                        |
| Female                                                               | 9 (43%)                 | 26 (72%)                              | 30 (68%)                               |
| Male                                                                 | 12 (57%)                | 10 (28%)                              | 14 (32%)                               |
| <b>Prior infection</b>                                               |                         |                                       |                                        |
| PCR/Antibody confirmed prior infection                               | 11 (52%)                | 12 (33%)                              | 13 (30%)                               |
| No prior infection                                                   | 10 (48%)                | 24 (67%)                              | 31 (70%)                               |
| <b>Vaccine type</b>                                                  |                         |                                       |                                        |
| None                                                                 | 21 (100%)               | 0 (0%)                                | 0 (0%)                                 |
| Ad26.COVS2.S                                                         | NA                      | 4 (11%)                               | 7* (16%)<br>27**                       |
| BNT-162b2                                                            | NA                      | 24 (67%)                              | (61%)<br>10***                         |
| mRNA-1273                                                            | NA                      | 8 (22%)                               | (23%)                                  |
| <b>Duration after primary vaccination series (median days (IQR))</b> | NA                      | 220 (207, 243)                        | 232 (216, 250)                         |
| <b>Booster type</b>                                                  |                         |                                       |                                        |
| heterologous                                                         | NA                      | NA                                    | 7 (16%)                                |
| homologous                                                           | NA                      | NA                                    | 37 (84%)                               |
| <b>Duration after booster (median days (IQR))</b>                    | NA                      | NA                                    | 10 (9, 15)                             |

<sup>#</sup> includes paired pre-boost and post-boost samples from 25 individuals

\* includes 3 boosted with Ad26.COVS2.S, 2 with mRNA-1273 and 2 with BNT162b2

\*\* includes 25 boosted with BNT162b2 and 2 with mRNA-1273

**Table S2: Details of variant peptide pools for spike and non-spike structural proteins, related to Figure 1.**

|                                      | Wildtype | Spike<br>Delta | Omicron        | Nucleocapsid,<br>Membrane,<br>Envelope, ORF3A |                |
|--------------------------------------|----------|----------------|----------------|-----------------------------------------------|----------------|
|                                      |          |                |                | Wildtype                                      | Omicron        |
| <b>Number of peptides in pool</b>    | 315      | 315            | 315            | 237                                           | 237            |
| <b>Peptides shared with wildtype</b> | Ref      | 288<br>(91.4%) | 229<br>(72.7%) | Ref                                           | 213<br>(89.9%) |
| <b>Peptides unique to variant</b>    | Ref      | 27<br>(8.6%)   | 86<br>(27.3%)  | Ref                                           | 24<br>(10.1%)  |

**Table S3: Multivariate regression of total T-cell response to SARS-CoV-2 spike peptides in vaccinated individuals, related to Figures 1 and 2.**

|                                                           |     | <b>Effect estimate<br/>on total T-cell<br/>response (in log<sub>10</sub><br/>CFU/10<sup>6</sup> PBMC)</b> | <b>95% Confidence<br/>Interval</b> | <b>p-<br/>value</b> |
|-----------------------------------------------------------|-----|-----------------------------------------------------------------------------------------------------------|------------------------------------|---------------------|
| <b>Age (per 10 year increase)</b>                         |     | -0.03                                                                                                     | -0.09, 0.03                        | 0.3                 |
| <b>Sex</b>                                                |     |                                                                                                           |                                    |                     |
| Female                                                    | Ref |                                                                                                           |                                    |                     |
| Male                                                      |     | -0.03                                                                                                     | -0.21, 0.15                        | 0.7                 |
| <b>SARS-CoV-2 variant</b>                                 |     |                                                                                                           |                                    |                     |
| ancestral                                                 | Ref |                                                                                                           |                                    |                     |
| Delta (B.1.617.2)                                         |     | -0.09                                                                                                     | -0.27, 0.09                        | 0.3                 |
| Omicron (B.1.1529)                                        |     | -0.03                                                                                                     | -0.21, 0.15                        | 0.7                 |
| <b>Prior infection</b>                                    |     |                                                                                                           |                                    |                     |
| No prior infection                                        | Ref |                                                                                                           |                                    |                     |
| PCR/Antibody confirmed prior infection                    |     | 0.55                                                                                                      | 0.38, 0.72                         | <0.001              |
| <b>Vaccine type</b>                                       |     |                                                                                                           |                                    |                     |
| mRNA-1273                                                 | Ref |                                                                                                           |                                    |                     |
| BNT-162b2                                                 |     | 0.09                                                                                                      | -0.10, 0.28                        | 0.3                 |
| Ad26.COVS.S                                               |     | -0.05                                                                                                     | -0.32, 0.22                        | 0.7                 |
| <b>Duration after primary vaccination series in weeks</b> |     | -0.02                                                                                                     | -0.05, 0.00                        | 0.028               |
| <b>Booster group</b>                                      |     |                                                                                                           |                                    |                     |
| pre-boost                                                 | Ref |                                                                                                           |                                    |                     |
| post-boost                                                |     | 1.1                                                                                                       | 0.91, 1.2                          | <0.001              |

**Table S4. Frequency of individuals with greater than 50% ( $0.3\log_{10}$ ) reduction in circulating effector T-cell response to variant, relative to wildtype, related to Figures 1 and 2.**

|                |                           | <b>Unvaccinated</b> | <b>Pre-booster</b> | <b>Post-booster</b> | <b>Overall</b> |
|----------------|---------------------------|---------------------|--------------------|---------------------|----------------|
| <b>Omicron</b> | <b>Prior infected</b>     | 27.3% (3/11)        | 8.3% (1/12)        | 15.4% (2/13)        | 15.3%          |
|                | <b>No prior infection</b> | -                   | 25% (6/24)         | 6.5% (2/31)         | (14/91)*       |
| <b>Delta</b>   | <b>Prior infected</b>     | 18.2% (2/11)        | 0% (0/12)          | 0% (0/13)           | 5.9%           |
|                | <b>No prior infection</b> | -                   | 16.7% (3/18)       | 0% (0/31)           | (5/85)         |

\*Fisher's exact test comparing frequency for Omicron vs. Delta in 85 individuals with both measured, i.e. 13/85 5/85; p-value 0.024.

**Table S5: Multivariate regression of CD4<sup>+</sup> and CD8<sup>+</sup> T-cell proliferative response to SARS-CoV-2 spike peptides in vaccinated individuals, related to Figures 1 and 2.**

|                                                           | CD4+ Memory T cell response |                         |         | CD8+ Memory T cell response |                         |         |
|-----------------------------------------------------------|-----------------------------|-------------------------|---------|-----------------------------|-------------------------|---------|
|                                                           | Effect estimate             | 95% Confidence Interval | p-value | Effect estimate             | 95% Confidence Interval | p-value |
| <b>Age (per 10 year increase)</b>                         | 0.16                        | -1.2, 1.5               | 0.8     | -0.67                       | -2.2, 0.88              | 0.4     |
| <b>Sex</b>                                                |                             |                         |         |                             |                         |         |
| Female                                                    | Ref                         |                         |         |                             |                         |         |
| Male                                                      | 0.72                        | -3.1, 4.5               | 0.7     | 0.72                        | -3.1, 4.5               | 0.7     |
| <b>SARS-CoV-2 variant</b>                                 |                             |                         |         |                             |                         |         |
| ancestral Omicron (B.1.1529)                              | Ref                         |                         |         |                             |                         |         |
| (B.1.1529)                                                | -1                          | -4.5, 2.5               | 0.6     | -3.4                        | -7.4, 0.58              | 0.093   |
| <b>Prior infection</b>                                    |                             |                         |         |                             |                         |         |
| No prior infection                                        | Ref                         |                         |         |                             |                         |         |
| PCR/Antibody confirmed prior infection                    | 0.42                        | -3.2, 4.1               | 0.8     | 3.6                         | -0.54, 7.8              | 0.087   |
| <b>Vaccine type</b>                                       |                             |                         |         |                             |                         |         |
| mRNA-1273                                                 | Ref                         |                         |         | 4.1                         | -0.79, 9.0              | 0.1     |
| BNT-162b2                                                 | 1.6                         | -2.7, 5.9               | 0.5     | 0.28                        | -9.0, 9.6               | >0.9    |
| Ad26.COV2.S                                               | 2                           | -6.2, 10                | 0.6     |                             |                         |         |
| <b>Duration after primary vaccination series in weeks</b> | -0.28                       | -0.74, 0.18             | 0.2     | -0.01                       | -0.53, 0.51             | >0.9    |
| <b>Booster group</b>                                      |                             |                         |         |                             |                         |         |
| pre-boost                                                 | Ref                         |                         |         |                             |                         |         |
| post-boost                                                | 3.2                         | -1.2, 7.5               | 0.2     | 5.4                         | 0.48, 10                | 0.032   |

**Table S7: HLA genotypes of representative participants who demonstrated >50% decline in T-cell reactivity to SARS-CoV-2 Omicron, related to Table 1.**

| <b>Participant</b> | <b>HLA-A Allele 1</b> | <b>HLA-A Allele 2</b> | <b>HLA-B Allele 1</b> | <b>HLA-B Allele 2</b> | <b>HLA-C Allele 1</b> | <b>HLA-C Allele 2</b> | <b>Number of HLA-I alleles predicted to be affected by loss in Omicron binding</b> |
|--------------------|-----------------------|-----------------------|-----------------------|-----------------------|-----------------------|-----------------------|------------------------------------------------------------------------------------|
| 1                  | <b>11:01</b>          | <b>30:01</b>          | <b>15:01</b>          | <b>42:02</b>          | <b>01:02</b>          | 17:01                 | 5                                                                                  |
| 2                  | <b>01:01</b>          | <b>29:02</b>          | <b>08:01</b>          | 44:03                 | 07:01                 | <b>16:01</b>          | 4                                                                                  |
| 3                  | 02:01                 | <b>26:01</b>          | <b>08:01</b>          | <b>38:01</b>          | 07:01                 | <b>12:03</b>          | 4                                                                                  |
| 4                  | <b>23:01</b>          | 80:01                 | 18:01                 | 44:03                 | <b>02:02</b>          | <b>04:01</b>          | 3                                                                                  |
| 5                  | 02:01                 | <b>32:01</b>          | <b>35:01</b>          | 58:01                 | <b>04:01</b>          | 07:01                 | 3                                                                                  |
| 6                  | <b>24:02</b>          | <b>24:02</b>          | <b>15:20</b>          | <b>15:20</b>          | <b>01:02</b>          | <b>01:02</b>          | 6                                                                                  |
| 7                  | <b>01:01</b>          | <b>68:01</b>          | 50:02                 | <b>52:01</b>          | <b>06:02</b>          | <b>12:02</b>          | 5                                                                                  |
| 8                  | 02:01                 | <b>29:02</b>          | <b>35:01</b>          | 51:01                 | <b>04:01</b>          | <b>15:09</b>          | 4                                                                                  |
| 9                  | 31:01                 | 68:03                 | <b>39:05</b>          | <b>40:02</b>          | 03:05                 | <b>07:02</b>          | 3                                                                                  |
| 10                 | <b>23:01</b>          | <b>30:02</b>          | 40:01                 | 51:01                 | 03:04                 | <b>15:02</b>          | 3                                                                                  |

*Bolded HLA class I alleles are those where binding to wildtype epitopes is affected by mutations in Omicron.*
